# Supplementary material for: SARS-CoV-2 variants: levels of neutralisation required for protective immunity
Source: bioRxiv or medRxiv preprint supplement (doi:10.1101/2021.08.11.21261876), 2021-08-13
Supplement: Supplementary file [file media-2.pdf]

**Supplementary Table 1:**

| Reference | Serum type      | Dosage                                             | Measured on day                                                             | Assay                                                  | Variants tested                                                                        | Data derived from:                          | Figure Lab Number |
|-----------|-----------------|----------------------------------------------------|-----------------------------------------------------------------------------|--------------------------------------------------------|----------------------------------------------------------------------------------------|---------------------------------------------|-------------------|
| 1         | Convalescent    | n/a                                                | > 1 month post recovery (severe and non-severe)                             | Live virus end point microneutralisation assay, ID50   | Ancestral (WA1)<br>Alpha/B.1.1.7<br>Beta/B.1.351                                       | Fig 3b and Fig 4b, raw data kindly provided | Laboratory 1      |
|           | mRNA-1273       | 100 µg                                             | 15 days post second dose                                                    |                                                        |                                                                                        |                                             |                   |
|           | BNT162b2        | ns                                                 | > 7 days post second dose                                                   |                                                        |                                                                                        |                                             |                   |
| 2         | Convalescent    | n/a                                                | > 1 month post recovery (severe and non-severe)                             | Live virus end point microneutralisation assay, ID50   | Ancestral (WA1)<br>Gamma/P.1                                                           | Fig S1C and D, raw data kindly provided     | Laboratory 1      |
|           | mRNA-1273       | 100 µg                                             | 15 days post second dose                                                    |                                                        |                                                                                        |                                             |                   |
|           | BNT162b2        |                                                    | >7 days post second dose                                                    |                                                        |                                                                                        |                                             |                   |
| 3         | Convalescent    | n/a                                                | 4-9 weeks post infection                                                    | Live virus focus reduction neutralisation test, FRNT50 | Ancestral (Victoria)<br>Beta/B.1.351                                                   | Fig 2c/Table S1a                            | Laboratory 2      |
|           | BNT162b2        | 30 µg                                              | 7-17 days post second dose                                                  |                                                        |                                                                                        | Fig 3c/Table S2                             |                   |
|           | CHAdOx1/AZD1222 | Standard or half dose                              | 14 or 28 days post second dose                                              |                                                        |                                                                                        | Fig 3d/Table S2                             |                   |
| 4         | Convalescent    | n/a                                                | 4-9 weeks post infection                                                    | Live virus focus reduction neutralisation test, IC50   | Ancestral (Victoria)<br>Gamma/P.1                                                      | Table S4A                                   | Laboratory 2      |
|           | BNT162b2        | 30 µg                                              | 4-17 days post second dose                                                  |                                                        |                                                                                        | Table S5                                    |                   |
|           | CHAdOx1/AZD1222 | Standard or half dose                              | 14 or 28 days post second dose                                              |                                                        |                                                                                        |                                             |                   |
| 5         | Convalescent    | n/a                                                | 4-9 weeks post infection                                                    | Live virus focus reduction neutralisation test FRNT50  | Ancestral (Victoria)<br>Alpha/B.1.1.7                                                  | Fig5a, raw data kindly provided             | Laboratory 2      |
|           | BNT162b2        | 30 µg                                              | 7-17 days post second dose                                                  |                                                        |                                                                                        | Fig5b, raw data kindly provided             |                   |
|           | CHAdOx1/AZD1222 | Standard dose (5 x 10 <sup>10</sup> ) or half dose | 14 or 28 days post second dose                                              |                                                        |                                                                                        | Fig5c, raw data kindly provided             |                   |
| 6         | Convalescent    | n/a                                                | 4-9 weeks post infection                                                    | Live virus focus reduction neutralisation test, FRNT50 | Delta/B.1.617.2                                                                        | Table S4                                    | Laboratory 2      |
|           | BNT162b2        | 30 µg                                              | 7-17 days post second dose                                                  |                                                        |                                                                                        |                                             |                   |
|           | CHAdOx1/AZD1222 | Standard or half dose                              | 14 or 28 days post second dose                                              |                                                        |                                                                                        |                                             |                   |
| 7         | Convalescent    | n/a                                                | 168-197 days post symptom onset. Mild/moderate, severe and critical disease | Live virus, GFP-split reporter system, IC50            | D614G (hCoV-19/France/GE1973/2020)<br>Alpha/B.1.1.7<br>Beta/B.1.351                    | Fig 2b, raw data kindly provided            | Laboratory 3      |
| 8         | Convalescent    | n/a                                                | 6 months post symptom onset                                                 | Live virus, GFP-split reporter system, IC50            | D614G (hCoV-19/France/GE1973/2020)<br>Alpha/B.1.1.7<br>Beta/B.1.351<br>Delta/B.1.617.2 | Fig 4a, raw data kindly supplied            | Laboratory 3      |
|           | BNT162b2        | ns                                                 | Ave 36 days (32-46)                                                         |                                                        |                                                                                        |                                             |                   |
| 9         | Convalescent    | n/a                                                | ~ 1 month post mild infection                                               | Live virus focus reduction                             | Ancestral WA1 with D614G (recombinant)<br>Alpha/B.1.1.7- isolate                       | Fig 2a,e, raw data kindly provided          | Laboratory 4      |

|    |              |                         |                                                                                                             |                                                                 |                                                                                                    |                                                                                                                                     |               |
|----|--------------|-------------------------|-------------------------------------------------------------------------------------------------------------|-----------------------------------------------------------------|----------------------------------------------------------------------------------------------------|-------------------------------------------------------------------------------------------------------------------------------------|---------------|
|    | BNT162b2     | ns                      | 7 days post second dose                                                                                     | neutralisation test, EC50                                       | Beta/B.1.351 spike (recombinant)                                                                   | Fig 4a,d, raw data kindly provided                                                                                                  |               |
| 10 | Convalescent | n/a                     | 10-102 days post infection                                                                                  | Live virus<br>Plaque reduction<br>neutralisation test<br>PRNT50 | Ancestral<br>Gamma/P.1                                                                             | Supplementary table 4                                                                                                               | Laboratory 5  |
| 11 | Convalescent | n/a                     | 6-43 days post symptom onset/first PCR test positive                                                        | Live virus focus reduction<br>neutralisation test, IC50         | Ancestral (hCoV-19/England/02/2020)<br>Alpha/B.1.1.7<br>Beta/B.1.351                               | 2b, raw data kindly provided                                                                                                        | Laboratory 6  |
| 12 | BBV152       | ns                      | ns                                                                                                          | Live virus<br>Plaque reduction<br>neutralisation test<br>PRNT50 | Ancestral<br>Alpha/B.1.1.7                                                                         | Fig 1b                                                                                                                              | Laboratory 7  |
| 13 | Convalescent | n/a                     | 1 to 8 weeks after resolution of infection or 2 to 10 weeks after the most recent positive SARS-CoV-2 test. | Lentivirus based<br>pseudovirus assay,<br>ID50                  | Ancestral with D614G<br>Alpha/B.1.1.7                                                              | Fig 2a/Table S1                                                                                                                     | Laboratory 8  |
|    | mRNA-1273    | 100 µg                  | 28 days post second dose                                                                                    |                                                                 |                                                                                                    |                                                                                                                                     |               |
|    | NVX-CoV2373  | 5 µg protein + Matrix M | 14 days post second dose                                                                                    |                                                                 |                                                                                                    |                                                                                                                                     |               |
| 14 | Convalescent | n/a                     | 1 to 8 weeks after resolution of infection or 2 to 10 weeks after the most recent positive SARS-CoV-2 test. | Lentivirus based<br>pseudovirus assay,<br>ID50                  | Ancestral with D614G<br>Beta/B.1.351                                                               | Fig 1a/Table S2                                                                                                                     | Laboratory 8  |
|    | mRNA-1273    | 100 µg                  | 28 days post second dose                                                                                    |                                                                 |                                                                                                    |                                                                                                                                     |               |
|    | NVX-CoV2373  | 5 µg protein + Matrix M | 14 days post second dose                                                                                    |                                                                 |                                                                                                    |                                                                                                                                     |               |
| 15 | Convalescent | n/a                     | 2-85 days post + PCR test                                                                                   | Live virus focus reduction<br>neutralisation test,<br>ID50      | B.1.126 ('WT')<br>Beta/B.1.351                                                                     | Fig 4a                                                                                                                              | Laboratory 9  |
|    | BNT162b2     | ns                      | 7-16 days post second dose                                                                                  |                                                                 |                                                                                                    |                                                                                                                                     |               |
| 16 | Convalescent | n/a                     | 31-91 days post symptom onset                                                                               | Live virus focus reduction<br>neutralisation test,<br>FRNT50    | Ancestral (WA1)<br>Kappa/B.1.617.1                                                                 | Fig 1a/Supplementary table 2                                                                                                        | Laboratory 10 |
|    | BNT162b2     | ns                      | 7-27 days post second dose                                                                                  |                                                                 |                                                                                                    | Fig 1c/ Supplementary table 3                                                                                                       |               |
|    | mRNA-1273    | ns                      | 35-51 days post second dose                                                                                 |                                                                 |                                                                                                    | Fig 1b/ Supplementary table 4                                                                                                       |               |
| 17 | BNT162b2     | ns                      | Median: 28 days post second dose                                                                            | Live virus focus reduction<br>neutralisation test,<br>IC50      | Ancestral<br>(hCoV19/England/02/2020)<br>D614G<br>Alpha/B.1.1.7<br>Beta/B.1.351<br>Delta/B.1.617.2 | <a href="https://github.com/davidlvb/Crick-UCLH-Legacy-VOCs-2021-05">https://github.com/davidlvb/Crick-UCLH-Legacy-VOCs-2021-05</a> | Laboratory 11 |

ns. Not specified

**Supplementary Table 2:**

| Study | Vaccine         | Trial Started (Day)               | Variants compared |                  |                  | Measure of effectiveness                                  | Efficacy against severe disease                                                  |                            |                 | Trial design                | Data derived from |
|-------|-----------------|-----------------------------------|-------------------|------------------|------------------|-----------------------------------------------------------|----------------------------------------------------------------------------------|----------------------------|-----------------|-----------------------------|-------------------|
|       |                 |                                   | Alpha/B.1.1.7     | Beta/B.1.351     | Delta/B.1.617.2  |                                                           | Alpha/B.1.1.7                                                                    | Beta/B.1.351               | Delta/B.1.617.2 |                             |                   |
| 18    | BNT162b2        | 14 days post 2 <sup>nd</sup> dose | 89.5%*            | 75%#             | N/A              | Any documented infection                                  | 100%<br>(95% CI: 81.7-100)                                                       | 100%<br>(95% CI: 73.7-100) | N/A             | Test negative case control  | Table 1           |
| 19    | BNT162b2        | 14 days post 2 <sup>nd</sup> dose | 93.4%             |                  | 87.9%            | Symptomatic disease                                       | ND                                                                               |                            |                 | Test negative case control  | Table 2           |
|       | ChAdOx1 nCoV-19 | 14 days post 2 <sup>nd</sup> dose | 66.1%             |                  | 59.8%            | Symptomatic disease                                       | ND                                                                               |                            |                 |                             |                   |
| 20    | ChAdOx1 nCoV-19 | 14 days post 2 <sup>nd</sup> dose |                   | 10.4%            |                  | Symptomatic disease                                       | Not able to report.                                                              |                            |                 | Randomized controlled trial | Table 2           |
| 21    | NVX-CoV2373     | 7 days post 2 <sup>nd</sup> dose  |                   | 51% <sup>^</sup> |                  | Symptomatic disease                                       | Not able to report                                                               |                            |                 | Randomized controlled trial | In text           |
| 22    | NVX-CoV2373     | 7 days post 2 <sup>nd</sup> dose  | 86.3%             |                  |                  | PCR confirmed symptomatic COVID, mild, moderate or severe | Not specifically reported (only 5 cases of severe disease, all in placebo group) |                            |                 | Randomized controlled trial | Fig 4             |
| 23    | Ad26.COVS.2.S   | 28 days post dose                 |                   | 64%              |                  | Moderate/severe disease                                   |                                                                                  | 81.7%                      |                 | Randomized controlled trial | Table 3           |
| 24    | BNT162b2        | 14 days post 2 <sup>nd</sup> dose | 92%*              |                  | 79% <sup>δ</sup> | PCR confirmed infection                                   | Not reported                                                                     |                            |                 | Test negative case control  | Text              |
|       | ChAdOx1 nCoV-19 | 14 days post 2 <sup>nd</sup> dose | 73%*              |                  | 60% <sup>δ</sup> |                                                           |                                                                                  |                            |                 |                             |                   |

\*S-gene "target failure" PCR used as indicator of B.1.1.7, # Assumed to be B.1.351 if not B.1.117, <sup>δ</sup> S-gene positive PCR assumed to be B.1.617.2

<sup>^</sup> HIV-negative population

### Supplementary Table 3:

| Source of uncertainty                                                                                                      |             | Parameter in model    | Estimated value             | Standard error in value         | Reference     |
|----------------------------------------------------------------------------------------------------------------------------|-------------|-----------------------|-----------------------------|---------------------------------|---------------|
| Model parameters ( $\log_{10}$ of the 50% protective neutralisation titre and natural log of the logistic slope parameter) | Symptomatic | $n_{50}, k_{\log}$    | 1.13, -0.697                | Covariance matrix from fit      | 25            |
|                                                                                                                            | Severe      | $n_{50}, k_{\log}$    | 1.12, -1.509                | Covariance matrix from fit      | 25            |
| Standard deviation of neutralisation titres for each vaccine                                                               |             | $\sigma_{all}$        | 0.46                        | 0.022                           | 25            |
| Mean ( $\log_{10}$ ) neutralisation level of a vaccine against ancestral virus                                             |             | $\mu_s$               | Table S4 of reference (Ref) | Max. value across studies, 0.20 | 25            |
| Fold-change ( $\log_{10}$ ) in neutralisation titre against each variant                                                   |             | $\log_{10} \bar{F}^v$ | Fig. S3                     | 0.015-0.029                     | Current study |

Table S3: Sources of uncertainty in model predictions of vaccine efficacy against variants. In this table we use  $k_{\log}$  to denote  $\log_e(k)$ .

**Supplementary Table 4:**

| Reference | Vaccine               | Reference Group | Boosted Group (days post-infection)                    | Measured on day post-dose      | Assay                                                      | Fold change (Boosted/Reference) for ancestral virus | Neutralisation titre (fold convalescent) in reference group (Phase I/II trials) <sup>25</sup> | Predicted mean neutralisation level after boosting (fold convalescent) | Date derived from               | Data on Variants                                     |
|-----------|-----------------------|-----------------|--------------------------------------------------------|--------------------------------|------------------------------------------------------------|-----------------------------------------------------|-----------------------------------------------------------------------------------------------|------------------------------------------------------------------------|---------------------------------|------------------------------------------------------|
| 26        | BNT162b2              | Naïve, 2 doses  | Convalescent, 1 dose (mean:111)                        | 10                             | Live virus Microneutralisation test, 50% endpoint titre    | 4.8                                                 | 2.4                                                                                           | 11.4                                                                   | GMT titres in text              |                                                      |
| 27        | BNT162b2              | Naïve, 2 doses  | Convalescent, 2 doses (median: 53)                     | >14                            | Live virus, Focus reduction neutralisation test (FRNT50)   | 3.4                                                 | 2.4                                                                                           | 8.0                                                                    | Extracted from Figure 2         | Alpha, Beta, Gamma                                   |
| 28        | BNT162b2 or mRNA-1273 | Naïve, 2 doses  | Convalescent, 2 doses (median: 247)                    | 19/13 (reference/convalescent) | Pseudovirus neutralisation                                 | 5                                                   | 3.1*                                                                                          | 15.7                                                                   | Mean value given in text        | Beta                                                 |
| 29        | BNT162b2 or mRNA-1273 | Naïve, 2 doses  | Convalescent, 2 doses (65-275)                         | 7                              | Pseudovirus neutralisation                                 | 9.2                                                 | 3.1*                                                                                          | 28.7                                                                   | Raw data in supplement appendix | Beta                                                 |
| 30        | BNT162b2 or mRNA-1273 | Naïve, 2 doses  | Convalescent, 2 doses                                  | 28                             | Live virus, Plaque reduction neutralisation assay (PRNT50) | 2                                                   | 3.1*                                                                                          | 6.1                                                                    | Raw data kindly supplied        | Alpha, Beta, Gamma, Delta, Epsilon, Eta, Iota, Kappa |
| 31 and 32 | mRNA-1273 (50 µg)     | Naïve, 2 doses  | mRNA-1273 boosted (177-226 post second dose)           | 7/15 (reference/boost)         | Pseudovirus neutralisation                                 | 2.5                                                 | 4.1                                                                                           | 10.1                                                                   | Figure 3 (31) and Figure 1 (32) | Beta, Gamma                                          |
| 33        | CoronaVac             | Naïve, 2 doses  | CoronaVac 3 <sup>rd</sup> dose, (180 post-second dose) | 14                             | Live virus, microneutralisation test                       | 4.9                                                 | 0.17                                                                                          | 0.82                                                                   | Figure 2                        |                                                      |

\* Geometric mean of neutralisation levels for BNT162b2 and mRNA-1273 reported in Phase I/II trials as summarised in reference 25

## References:

1. Wang, P. *et al.*, Antibody Resistance of Sars-Cov-2 Variants B.1.351 and B.1.1.7. *Nature* **593**, 130-135 (2021).
2. Wang, P. *et al.*, Increased Resistance of Sars-Cov-2 Variant P.1 to Antibody Neutralization. *Cell Host & Microbe* **29**, 747-751.e744 (2021).
3. Zhou, D. *et al.*, Evidence of Escape of Sars-Cov-2 Variant B.1.351 from Natural and Vaccine-Induced Sera. *Cell* **184**, 2348-2361.e2346 (2021).
4. Dejnirattisai, W. *et al.*, Antibody Evasion by the P.1 Strain of Sars-Cov-2. *Cell* **184**, 2939-2954.e2939 (2021).
5. Supasa, P. *et al.*, Reduced Neutralization of Sars-Cov-2 B.1.1.7 Variant by Convalescent and Vaccine Sera. *Cell* **184**, 2201-2211.e2207 (2021).
6. Liu, C. *et al.*, Reduced Neutralization of Sars-Cov-2 B.1.617 by Vaccine and Convalescent Serum. *Cell* (2021).
7. Planas, D. *et al.*, Sensitivity of Infectious Sars-Cov-2 B.1.1.7 and B.1.351 Variants to Neutralizing Antibodies. *Nature Medicine* **27**, 917-924 (2021).
8. Planas, D. *et al.*, Reduced Sensitivity of Sars-Cov-2 Variant Delta to Antibody Neutralization. *Nature* (2021).
9. Chen, R. E. *et al.*, Resistance of Sars-Cov-2 Variants to Neutralization by Monoclonal and Serum-Derived Polyclonal Antibodies. *Nature Medicine* **27**, 717-726 (2021).
10. Souza, W. M. *et al.*, Neutralisation of Sars-Cov-2 Lineage P.1 by Antibodies Elicited through Natural Sars-Cov-2 Infection or Vaccination with an Inactivated Sars-Cov-2 Vaccine: An Immunological Study. *The Lancet Microbe*.
11. Faulkner, N. *et al.*, Reduced Antibody Cross-Reactivity Following Infection with B.1.1.7 Than with Parental Sars-Cov-2 Strains. *eLife* **10**, e69317 (2021).
12. Sapkal, G. N. *et al.*, Neutralization of Uk-Variant Vui-202012/01 with Covaxin Vaccinated Human Serum. *bioRxiv*, 2021.2001.2026.426986 (2021).
13. Shen, X. *et al.*, Sars-Cov-2 Variant B.1.1.7 Is Susceptible to Neutralizing Antibodies Elicited by Ancestral Spike Vaccines. *Cell Host & Microbe* **29**, 529-539.e523 (2021).
14. Shen, X. *et al.*, Neutralization of Sars-Cov-2 Variants B.1.429 and B.1.351. *New England Journal of Medicine* **384**, 2352-2354 (2021).
15. Becker, M. *et al.*, Immune Response to Sars-Cov-2 Variants of Concern in Vaccinated Individuals. *Nature Communications* **12**, 3109 (2021).
16. Edara, V.-V. *et al.*, Infection and Vaccine-Induced Neutralizing-Antibody Responses to the Sars-Cov-2 B.1.617 Variants. *New England Journal of Medicine* (2021).
17. Wall, E. C. *et al.*, Neutralising Antibody Activity against Sars-Cov-2 Vocs B.1.617.2 and B.1.351 by Bnt162b2 Vaccination. *The Lancet* **397**, 2331-2333 (2021).
18. Abu-Raddad, L. J. *et al.*, Effectiveness of the Bnt162b2 Covid-19 Vaccine against the B.1.1.7 and B.1.351 Variants. *New England Journal of Medicine* (2021).
19. Lopez Bernal, J. *et al.*, Effectiveness of Covid-19 Vaccines against the B.1.617.2 (Delta) Variant. *New England Journal of Medicine* (2021).
20. Madhi, S. A. *et al.*, Efficacy of the Chadox1 Ncov-19 Covid-19 Vaccine against the B.1.351 Variant. *New England Journal of Medicine* **384**, 1885-1898 (2021).
21. Shinde, V. *et al.*, Efficacy of Nvx-Cov2373 Covid-19 Vaccine against the B.1.351 Variant. *New England Journal of Medicine* **384**, 1899-1909 (2021).
22. Heath, P. T. *et al.*, Safety and Efficacy of Nvx-Cov2373 Covid-19 Vaccine. *New England Journal of Medicine* (2021).
23. Sadoff, J. *et al.*, Safety and Efficacy of Single-Dose Ad26.Cov2.S Vaccine against Covid-19. *N Engl J Med* **384**, 2187-2201 (2021).
24. Sheikh, A. *et al.*, Sars-Cov-2 Delta Voc in Scotland: Demographics, Risk of Hospital Admission, and Vaccine Effectiveness. *The Lancet* **397**, 2461-2462 (2021).
25. Khoury, D. S. *et al.*, Neutralizing Antibody Levels Are Highly Predictive of Immune Protection from Symptomatic Sars-Cov-2 Infection. *Nature Medicine* **27**, 1205-1211 (2021).
26. Anichini, G. *et al.*, Sars-Cov-2 Antibody Response in Persons with Past Natural Infection. *New England Journal of Medicine* **385**, 90-92 (2021).
27. Leier, H. C. *et al.*, Previously Infected Vaccinees Broadly Neutralize Sars-Cov-2 Variants. *medRxiv*, 2021.2004.2025.21256049 (2021).
28. Stamatatos, L. *et al.*, Mrna Vaccination Boosts Cross-Variant Neutralizing Antibodies Elicited by Sars-Cov-2 Infection. *Science* **372**, 1413 (2021).
29. Goel, R. R. *et al.*, Distinct Antibody and Memory B Cell Responses in Sars-Cov-2 Naïve and Recovered Individuals after Mrna Vaccination. *Science Immunology* **6**, eabi6950 (2021).
30. Lucas, C. *et al.*, Impact of Circulating Sars-Cov-2 Variants on Mrna Vaccine-Induced Immunity in Uninfected and Previously Infected Individuals. *medRxiv*, 2021.2007.2014.21260307 (2021).
31. Wu, K. *et al.*, Preliminary Analysis of Safety and Immunogenicity of a Sars-Cov-2 Variant Vaccine Booster. *medRxiv*, 2021.2005.2005.21256716 (2021).
32. Choi, A. *et al.*, Serum Neutralizing Activity of Mrna-1273 against Sars-Cov-2 Variants. *bioRxiv*, 2021.2006.2028.449914 (2021).
33. Pan, H. *et al.*, Immunogenicity and Safety of a Third Dose, and Immune Persistence of Coronavac Vaccine in Healthy Adults Aged 18-59 Years: Interim Results from a Double-Blind, Randomized, Placebo-Controlled Phase 2 Clinical Trial. *medRxiv*, 2021.2007.2023.21261026 (2021).
